# Supplementary material
Source: PubMed Central journal article supplement (PMC6698884)
Supplement: mmc1.pdf [file mmc1.pdf]

**The American Journal of Human Genetics, Volume 105**

**Supplemental Data**

**Family Clustering of Autoimmune Vitiligo  
Results Principally from Polygenic Inheritance  
of Common Risk Alleles**

**Genevieve H.L. Roberts, Subrata Paul, Daniel Yorgov, Stephanie A. Santorico, and Richard A. Spritz**

**Figure S1: Multiplex and Simplex Probands from GWAS123 are Homogeneous with Respect to European Ancestry**

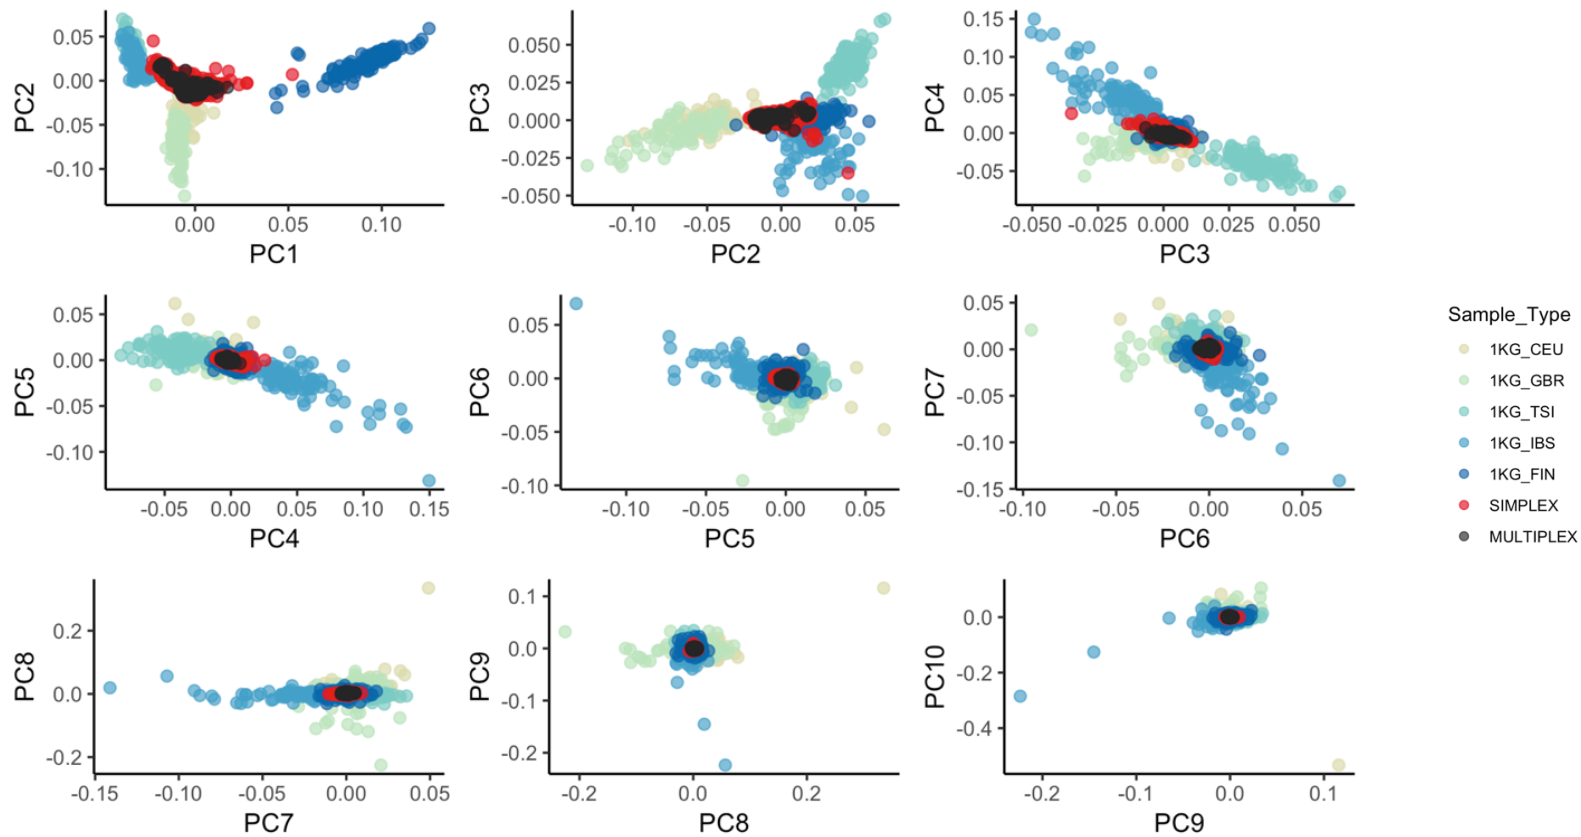

*Vitiligo GWAS123 Multiplex and Simplex probands and 1000 Genomes Project European-derived (1KGP EUR) subjects plotted by ancestry-derived principal components analysis (PCA). Nine outlying 1KGP subjects were removed from plots to improve visualization of GWAS123 vitiligo cases. Each dot represents a subject and the color of each dot represents the subject's population: 1KG\_CEU, 1KG Utah Resident; 1KG\_GBR, 1KG British in England and Scotland; 1KG\_TSI, 1KG Toscani in Italia; 1KG\_IBS, 1KG Iberian Population in Spain; 1KG\_FIN, 1KG Finnish in Finland; SIMPLEX, simplex cases from vitiligo GWAS123; MULTIPLEX, multiplex cases (unrelated) from vitiligo GWAS123.*

**Figure S2:** The CONFIRMED Risk Score Distribution in GWAS123 and Independent Replication Study Subjects

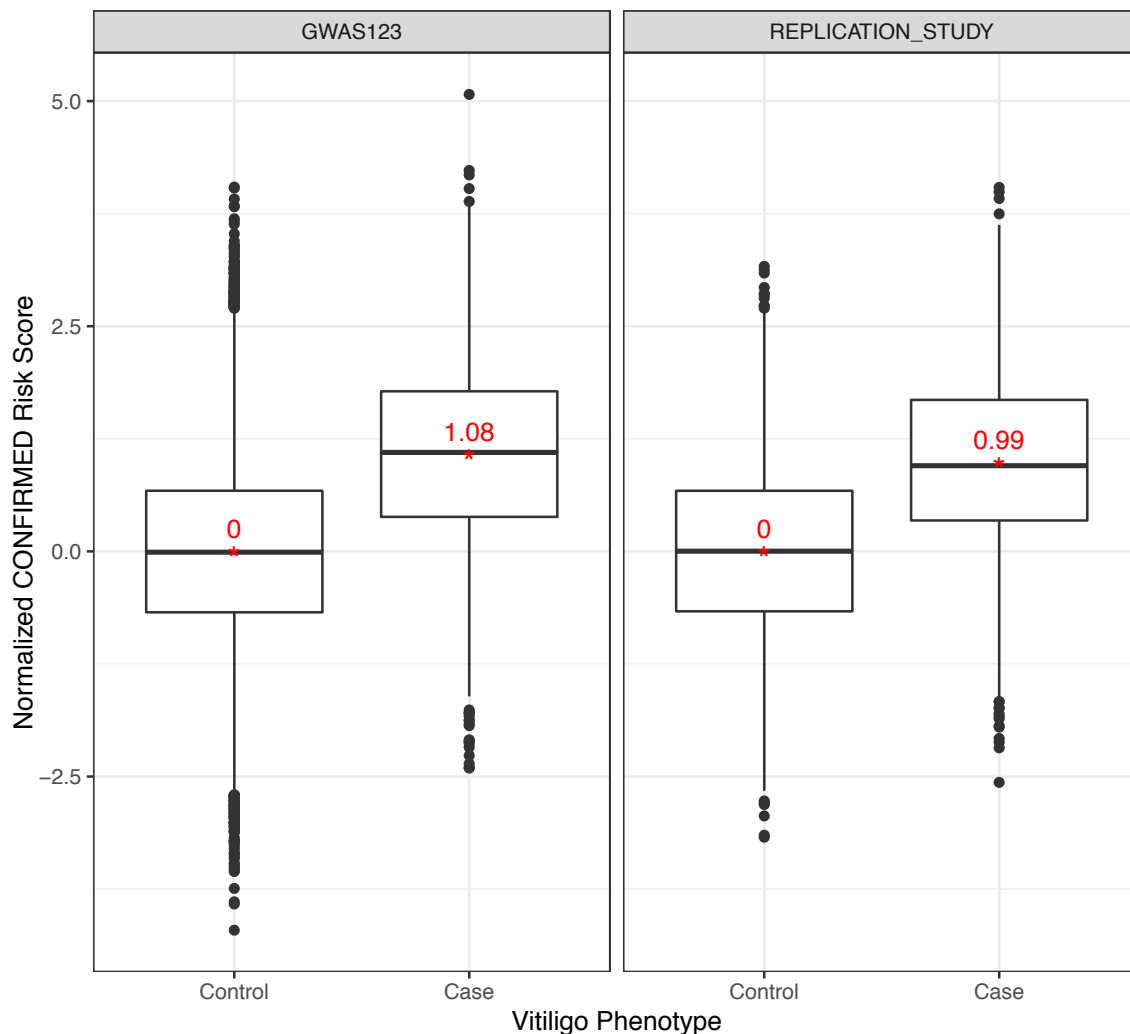

The normalized CONFIRMED risk score is plotted for vitiligo cases ( $n=2,841$ ) and controls ( $n=37,255$ ) in GWAS123 (left) and for cases ( $n=1,827$ ) and controls ( $n=2,181$ ) in the independent replication study (right). The mean and SD used for normalization were derived from GWAS123 controls; thus, the Y-axis units represent standard deviations (SD) difference from the mean risk score in GWAS123 controls. Horizontal lines denote the median, red \* denotes the mean, and the value of the mean is shown in red text. Boxes denote first through third quartiles. Each vertical bar extends from the box to the largest or smallest value, no more than 1.5 times the inter-quartile range. Data beyond the vertical bars are considered outliers and are plotted individually.

**Figure S3:** Comparison of single-variant contributions to the CONFIRMED risk score in simplex and multiplex probands from GWAS123 + replication study

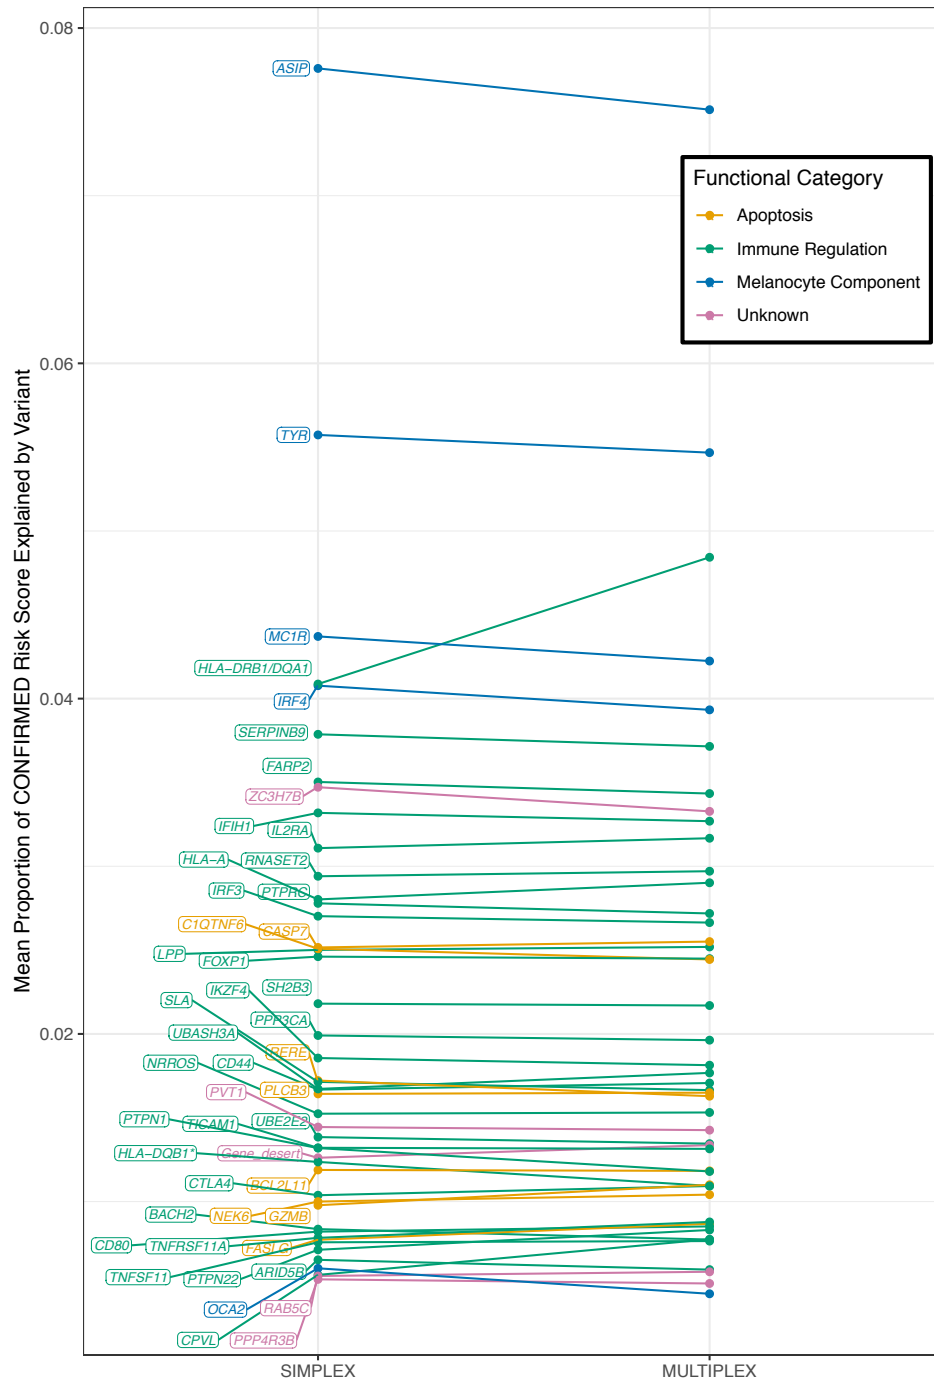

Each point represents the mean proportion contributed to the CONFIRMED risk score by each of the 48 loci. Higher vertical position represents increased contribution to the risk score on average, with more common, high-effect-size loci generally contributing the most. Dots for the same variant are connected by a horizontal line and a larger slope represents a larger difference between mean contribution of the variant in simplex probands versus in multiplex probands. Dot and label colors represent the likely functional category of the locus, as in Figure 1. \* denotes a HLA-DQB1 locus specifically associated in early-onset vitiligo cases<sup>2</sup>; the effect size used for the HLA-DQB1 variant here was derived from all vitiligo cases, regardless of age-of-onset. Association results for each locus are presented in Table S3.

**Table S1: Variants Used in Constructing 48-Variant CONFIRMED Risk Score**

| Chr. | Index variant              | Position (hg19) | Locus                                               | RA/OA | GWAS123 <sup>b</sup><br>OR | Risk Score Weight <sup>c</sup> |
|------|----------------------------|-----------------|-----------------------------------------------------|-------|----------------------------|--------------------------------|
| 1    | rs301807                   | 8484823         | <i>RERE</i>                                         | A/G   | 1.22                       | 0.199                          |
| 1    | rs2476601                  | 114377568       | <i>PTPN22</i>                                       | A/G   | 1.39                       | 0.329                          |
| 1    | rs78037977                 | 172715702       | <i>FASLG</i>                                        | G/A   | 1.33                       | 0.285                          |
| 1    | rs16843742                 | 198672299       | <i>PTPRC</i>                                        | T/C   | 1.22                       | 0.198                          |
| 2    | rs10200159                 | 55845109        | <i>PPP4R3B</i>                                      | C/T   | 1.48                       | 0.392                          |
| 2    | rs4308124                  | 112010486       | <i>BCL2L11-MIR4435-2HG</i>                          | C/T   | 1.17                       | 0.157                          |
| 2    | rs2111485                  | 163110536       | <i>IFIH1</i>                                        | G/A   | 1.33                       | 0.288                          |
| 2    | rs231725                   | 204740675       | <i>CTLA4</i>                                        | A/G   | 1.18                       | 0.166                          |
| 2    | rs41342147                 | 242407588       | <i>FARP2-STK25</i>                                  | G/A   | 1.25                       | 0.223                          |
| 3    | rs34080387 <sup>a</sup>    | 23505187        | <i>UBE2E2</i>                                       | C/G   | 1.15                       | 0.139                          |
| 3    | rs34346645                 | 71557945        | <i>FOXP1</i>                                        | C/A   | 1.25                       | 0.223                          |
| 3    | rs59374417 <sup>a</sup>    | 119288414       | <i>CD80-ADPRH</i>                                   | C/A   | 1.37                       | 0.315                          |
| 3    | rs13076312                 | 188089254       | <i>LPP</i>                                          | T/C   | 1.32                       | 0.278                          |
| 3    | rs6583331                  | 196347253       | <i>FBXO45-NRROS</i>                                 | T/A   | 1.16                       | 0.151                          |
| 4    | rs1031034                  | 102223386       | <i>PPP3CA</i>                                       | C/A   | 1.16                       | 0.151                          |
| 6    | rs12203592                 | 396321          | <i>IRF4</i>                                         | C/T   | 1.30                       | 0.261                          |
| 6    | rs78521699                 | 2908591         | <i>SERPINB9</i>                                     | A/G   | 1.27                       | 0.236                          |
| 6    | rs60131261                 | 29937335        | <i>HLA-A</i>                                        | D/I   | 1.53                       | 0.425                          |
| 6    | rs145954018 <sup>d,e</sup> | 32440321        | <i>HLA-DQB1</i> & Early Vitiligo Onset <sup>d</sup> | D/I   | 2.42                       | 0.884                          |
| 6    | rs9271597 <sup>e</sup>     | 32591291        | <i>HLA-DRB1/DQA1</i> <sup>e</sup>                   | A/T   | 1.77                       | 0.571                          |
| 6    | rs72928038                 | 90976768        | <i>BACH2</i>                                        | A/G   | 1.28                       | 0.247                          |
| 6    | rs4710154 <sup>a</sup>     | 167394634       | <i>RNASET2-FGFR1OP-CCR6</i>                         | A/T   | 1.27                       | 0.236                          |
| 7    | rs117744081                | 29132279        | <i>CPVL</i>                                         | G/A   | 1.95                       | 0.668                          |
| 8    | rs10087240 <sup>f</sup>    | 129012574       | <i>PVT1</i> <sup>f</sup>                            | T/C   | 1.18                       | 0.166                          |
| 8    | rs2687812                  | 133931055       | <i>TG-SLA-WISP1</i>                                 | A/T   | 1.21                       | 0.191                          |
| 9    | rs10986311                 | 127071493       | <i>NEK6</i>                                         | C/T   | 1.16                       | 0.148                          |
| 10   | rs706779                   | 6098824         | <i>IL2RA</i>                                        | T/C   | 1.35                       | 0.301                          |
| 10   | rs71508903                 | 63779871        | <i>ARID5B</i>                                       | T/C   | 1.18                       | 0.166                          |

|    |                         |           |                                                                       |     |      |       |
|----|-------------------------|-----------|-----------------------------------------------------------------------|-----|------|-------|
| 10 | rs12771452              | 115488331 | CASP7                                                                 | G/A | 1.20 | 0.186 |
| 11 | rs1043101               | 35274829  | CD44-SLC1A2                                                           | G/A | 1.24 | 0.215 |
| 11 | rs12421615              | 64021605  | PPP1R14B-PLCB3-<br>BAD-GPR137-KCNK4-<br>TEX40-ESRRA-<br>TRMT112-PRDX5 | G/A | 1.15 | 0.139 |
| 11 | rs1126809               | 89017961  | TYR                                                                   | G/A | 1.49 | 0.400 |
| 11 | rs11021232              | 95320808  | Gene desert                                                           | C/T | 1.38 | 0.322 |
| 12 | rs772921 <sup>a</sup>   | 56403577  | IKZF4                                                                 | T/C | 1.31 | 0.270 |
| 12 | rs10774625 <sup>a</sup> | 111910219 | SH2B3-ATXN2                                                           | A/G | 1.25 | 0.223 |
| 13 | rs35860234              | 43070206  | TNFSF11                                                               | G/T | 1.16 | 0.148 |
| 14 | rs8192917               | 25102160  | GZMB                                                                  | C/T | 1.23 | 0.207 |
| 15 | rs1635168               | 28535266  | OCA2-HERC2                                                            | A/C | 1.43 | 0.358 |
| 16 | rs4268748               | 90026512  | MC1R                                                                  | T/C | 1.37 | 0.315 |
| 17 | rs11079035              | 40289012  | KAT2A-HSPB9-RAB5C                                                     | A/G | 1.18 | 0.166 |
| 18 | rs8083511               | 60028655  | TNFRSF11A                                                             | C/A | 1.24 | 0.215 |
| 19 | rs4807000               | 4831878   | TICAM1                                                                | A/G | 1.19 | 0.174 |
| 19 | rs2304206               | 50168871  | SCAF1-IRF3-BCL2L12                                                    | G/A | 1.22 | 0.198 |
| 20 | rs6059655               | 32665748  | RALY-EIF252-ASIP-<br>AHCY-ITCH                                        | G/A | 1.59 | 0.462 |
| 20 | rs6012953               | 49123043  | PTPN1                                                                 | G/A | 1.16 | 0.148 |
| 21 | rs12482904              | 43851828  | UBASH3A                                                               | A/T | 1.43 | 0.358 |
| 22 | rs229527                | 37581485  | C1QTNF6                                                               | A/C | 1.34 | 0.293 |
| 22 | rs9611565               | 41767486  | ZC3H7B-TEF                                                            | T/C | 1.28 | 0.248 |

Chr., Chromosome; RA, Risk Allele; OA, Other Allele; OR, Odds Ratio.

<sup>a</sup>Tag SNP used for risk score calculation in place of index variant reported in GWAS123: rs34080387 in place of rs35161626 ( $D'=0.997$ ,  $r^2=0.993$ ); rs59374417 in place of rs148136154 ( $D'=0.999$ ,  $r^2=0.984$ ); rs4710154 in place of rs2247314 ( $D'=0.995$ ,  $r^2=0.985$ ); rs772921 in place of rs2017445 ( $D'=1$ ,  $r^2=0.998$ ); rs10774625 in place of rs10774624 ( $D'=0.975$ ,  $r^2=0.919$ ).

<sup>b</sup>Published GWAS123 OR<sup>1</sup>

<sup>c</sup>Risk score weight ( $\hat{\beta}$ ) is the  $\ln(\text{GWAS123 OR})$

<sup>d</sup>Association between rs145954018 and early-onset vitiligo<sup>2</sup>; OR reported is from GWAS123 meta-analysis in all cases and controls without accounting for vitiligo age-of-onset.

<sup>e</sup>Special coding is used in risk score calculation to account for LD between rs145954018 and rs9271597, see Methods for details.

<sup>f</sup>Association with rs10087240 published<sup>3</sup> separately from GWAS123

**Table S2: Variants Used in Constructing 14-Variant FAMILY Risk Score**

| Chr. | Locus                | Position (hg19) | FAMILY Risk Score Variant | GWAS123 Top Variant (If Different from FAMILY Variant) | $r^2$ | $D'$ | RA/OA | Risk Score Weight <sup>a</sup> |
|------|----------------------|-----------------|---------------------------|--------------------------------------------------------|-------|------|-------|--------------------------------|
| 1    | <i>RERE</i>          | 8501786         | rs301819                  | rs301807                                               | 0.97  | 1    | A/G   | 0.199                          |
| 1    | <i>PTPN22</i>        | 114377568       | rs2476601                 |                                                        |       |      | A/G   | 0.329                          |
| 2    | <i>CTLA4</i>         | 204763882       | rs3096851                 | rs231725                                               | 0.88  | 0.96 | C/A   | 0.166                          |
| 3    | <i>FOXP1</i>         | 71573135        | rs17008723                | rs34346645                                             | 0.16  | 0.99 | G/T   | 0.223                          |
| 3    | <i>LPP</i>           | 188089254       | rs13076312                |                                                        |       |      | T/C   | 0.278                          |
| 6    | <i>HLA-A</i>         | 29942639        | rs35066870                | rs60131261                                             | 0.97  | 1.00 | G/A   | 0.425                          |
| 6    | <i>HLA-DRB1/DQA1</i> | 32578052        | rs532098                  | rs9271597                                              | 0.81  | 0.95 | A/G   | 0.571                          |
| 10   | <i>IL2RA</i>         | 6098824         | rs706779                  |                                                        |       |      | T/C   | 0.301                          |
| 11   | <i>CD44-SLC1A2</i>   | 35289819        | rs1570214                 | rs1043101                                              | 0.99  | 0.99 | G/A   | 0.215                          |
| 11   | <i>TYR</i>           | 89011046        | rs1393350                 | rs1126809                                              | 0.93  | 1.00 | G/A   | 0.400                          |
| 11   | Gene Desert          | 95311422        | rs4409785                 | rs11021232                                             | 0.92  | 0.99 | C/T   | 0.322                          |
| 14   | <i>GZMB</i>          | 25102160        | rs8192917                 |                                                        |       |      | C/T   | 0.207                          |
| 21   | <i>UBASH3A</i>       | 43848521        | rs2839511                 | rs12482904                                             | 0.96  | 0.99 | A/G   | 0.358                          |
| 22   | <i>C1QTNF6</i>       | 37581485        | rs229527                  |                                                        |       |      | A/C   | 0.293                          |

Chr., Chromosome;  $r^2$ , SNP correlation between FAMILY and GWAS123 Top SNP;  $D'$ , linkage disequilibrium between FAMILY and GWAS123 Top SNP; RA, Risk Allele; OA, Other Allele.

<sup>a</sup>Risk Score Weight ( $\hat{\beta}$ ) is the  $\ln(\text{GWAS123 OR})$  of the most-associated GWAS123<sup>1</sup> (the same weight used in Table S1).

**Table S3: CONFIRMED Risk Score Explained by Individual Variants in Multiplex and Simplex Vitiligo Cases**

| Variant     | Locus                                      | Mean Proportion CONFIRMED Explained in Simplex Cases | Mean Proportion CONFIRMED Explained in Multiplex Cases | $\hat{\beta}_{multiplex}$ | $SE(\hat{\beta}_{multiplex})$ | p value | FDR-Adjusted p value |
|-------------|--------------------------------------------|------------------------------------------------------|--------------------------------------------------------|---------------------------|-------------------------------|---------|----------------------|
| rs301807    | <i>RERE</i>                                | 1.72E-02                                             | 1.63E-02                                               | -9.40E-04                 | 6.60E-04                      | 0.15    | 0.54                 |
| rs2476601   | <i>PTPN22</i>                              | 7.12E-03                                             | 8.31E-03                                               | 1.20E-03                  | 7.10E-04                      | 0.09    | 0.41                 |
| rs78037977  | <i>FASLG</i>                               | 7.72E-03                                             | 8.68E-03                                               | 9.40E-04                  | 6.80E-04                      | 0.17    | 0.54                 |
| rs16843742  | <i>PTPRC</i>                               | 2.78E-02                                             | 2.72E-02                                               | -6.00E-04                 | 5.30E-04                      | 0.26    | 0.73                 |
| rs10200159  | <i>PPP4R3B</i>                             | 5.36E-03                                             | 5.12E-03                                               | -2.30E-04                 | 6.90E-04                      | 0.74    | 0.89                 |
| rs4308124   | <i>BCL2L11-MIR4435-2HG</i>                 | 1.19E-02                                             | 1.18E-02                                               | -5.40E-05                 | 5.20E-04                      | 0.92    | 0.92                 |
| rs2111485   | <i>IFIH1</i>                               | 3.32E-02                                             | 3.27E-02                                               | -5.10E-04                 | 8.90E-04                      | 0.57    | 0.78                 |
| rs231725    | <i>CTLA4</i>                               | 1.04E-02                                             | 1.09E-02                                               | 5.60E-04                  | 5.20E-04                      | 0.28    | 0.75                 |
| rs41342147  | <i>FARP2-STK25</i>                         | 3.50E-02                                             | 3.43E-02                                               | -6.80E-04                 | 4.80E-04                      | 0.16    | 0.54                 |
| rs34080387  | <i>UBE2E2</i>                              | 1.38E-02                                             | 1.35E-02                                               | -3.90E-04                 | 4.60E-04                      | 0.39    | 0.75                 |
| rs34346645  | <i>FOXP1</i>                               | 2.46E-02                                             | 2.45E-02                                               | -1.20E-04                 | 7.10E-04                      | 0.87    | 0.92                 |
| rs59374417  | <i>CD80-ADPRH</i>                          | 8.21E-03                                             | 8.52E-03                                               | 2.90E-04                  | 7.30E-04                      | 0.69    | 0.87                 |
| rs13076312  | <i>LPP</i>                                 | 2.50E-02                                             | 2.52E-02                                               | 1.70E-04                  | 8.90E-04                      | 0.85    | 0.92                 |
| rs6583331   | <i>FBXO45-NRROS</i>                        | 1.52E-02                                             | 1.53E-02                                               | 7.60E-05                  | 4.90E-04                      | 0.88    | 0.92                 |
| rs1031034   | <i>PPP3CA</i>                              | 1.99E-02                                             | 1.96E-02                                               | -2.80E-04                 | 4.40E-04                      | 0.52    | 0.78                 |
| rs12203592  | <i>IRF4</i>                                | 4.08E-02                                             | 3.93E-02                                               | -1.40E-03                 | 5.70E-04                      | 0.01    | 0.13                 |
| rs78521699  | <i>SERPINB9</i>                            | 3.79E-02                                             | 3.72E-02                                               | -7.20E-04                 | 4.80E-04                      | 0.13    | 0.52                 |
| rs60131261  | <i>HLA-A</i>                               | 2.80E-02                                             | 2.90E-02                                               | 1.00E-03                  | 1.30E-03                      | 0.46    | 0.78                 |
| rs145954018 | <i>HLA-DQB1 &amp; Early Vitiligo Onset</i> | 1.24E-02                                             | 1.09E-02                                               | -1.40E-03                 | 1.50E-03                      | 0.34    | 0.75                 |
| rs9271597   | <i>HLA-DRB1/DQA1</i>                       | 4.09E-02                                             | 4.84E-02                                               | 7.60E-03                  | 1.90E-03                      | 9.6E-05 | 4.6E-03              |
| rs72928038  | <i>BACH2</i>                               | 8.36E-03                                             | 7.74E-03                                               | -6.30E-04                 | 6.30E-04                      | 0.32    | 0.75                 |
| rs4710154   | <i>RNASET2-FGFR1OP-CCR6</i>                | 2.94E-02                                             | 2.97E-02                                               | 3.10E-04                  | 7.10E-04                      | 0.66    | 0.86                 |
| rs117744081 | <i>CPVL</i>                                | 5.63E-03                                             | 7.75E-03                                               | 2.10E-03                  | 9.10E-04                      | 0.02    | 0.18                 |
| rs10087240  | <i>PVT1</i>                                | 1.44E-02                                             | 1.43E-02                                               | -1.90E-04                 | 5.40E-04                      | 0.72    | 0.89                 |
| rs2687812   | <i>TG-SLA-WISP1</i>                        | 1.71E-02                                             | 1.66E-02                                               | -5.00E-04                 | 6.30E-04                      | 0.43    | 0.78                 |



|            |                                                                                 |          |          |           |          |         |      |
|------------|---------------------------------------------------------------------------------|----------|----------|-----------|----------|---------|------|
| rs10986311 | <i>NEK6</i>                                                                     | 1.00E-02 | 1.04E-02 | 4.20E-04  | 4.70E-04 | 0.37    | 0.75 |
| rs706779   | <i>IL2RA</i>                                                                    | 3.11E-02 | 3.17E-02 | 5.90E-04  | 9.50E-04 | 0.54    | 0.78 |
| rs71508903 | <i>ARID5B</i>                                                                   | 6.53E-03 | 5.94E-03 | -5.90E-04 | 4.50E-04 | 0.19    | 0.57 |
| rs12771452 | <i>CASP7</i>                                                                    | 2.52E-02 | 2.55E-02 | 3.50E-04  | 5.20E-04 | 0.50    | 0.78 |
| rs1043101  | <i>CD44-SLC1A2</i>                                                              | 1.67E-02 | 1.71E-02 | 3.90E-04  | 6.90E-04 | 0.57    | 0.78 |
| rs12421615 | <i>PPP1R14B-PLCB3-<br/>BAD-GPR137-KCNK4-<br/>TEX40-ESRRA-<br/>TRMT112-PRDX5</i> | 1.64E-02 | 1.65E-02 | 7.20E-05  | 4.30E-04 | 0.87    | 0.92 |
| rs1126809  | <i>TYR</i>                                                                      | 5.57E-02 | 5.47E-02 | -1.10E-03 | 1.10E-03 | 0.31    | 0.75 |
| rs11021232 | <i>Gene desert</i>                                                              | 1.26E-02 | 1.34E-02 | 7.50E-04  | 8.80E-04 | 0.39    | 0.75 |
| rs772921   | <i>IKZF4</i>                                                                    | 1.86E-02 | 1.81E-02 | -4.00E-04 | 8.60E-04 | 0.64    | 0.85 |
| rs10774625 | <i>SH2B3-ATXN2</i>                                                              | 2.18E-02 | 2.17E-02 | -1.30E-04 | 7.20E-04 | 0.86    | 0.92 |
| rs35860234 | <i>TNFSF11</i>                                                                  | 7.57E-03 | 7.64E-03 | 6.30E-05  | 4.30E-04 | 0.88    | 0.92 |
| rs8192917  | <i>GZMB</i>                                                                     | 9.78E-03 | 1.10E-02 | 1.20E-03  | 6.00E-04 | 0.04    | 0.26 |
| rs1635168  | <i>OCA2-HERC2</i>                                                               | 6.02E-03 | 4.50E-03 | -1.50E-03 | 6.90E-04 | 0.03    | 0.20 |
| rs4268748  | <i>MC1R</i>                                                                     | 4.37E-02 | 4.22E-02 | -1.50E-03 | 8.40E-04 | 0.08    | 0.41 |
| rs11079035 | <i>KAT2A-HSPB9-RAB5C</i>                                                        | 5.56E-03 | 5.81E-03 | 2.50E-04  | 4.30E-04 | 0.56    | 0.78 |
| rs8083511  | <i>TNFRSF11A</i>                                                                | 7.84E-03 | 8.79E-03 | 9.50E-04  | 5.70E-04 | 0.09    | 0.41 |
| rs4807000  | <i>TICAM1</i>                                                                   | 1.32E-02 | 1.31E-02 | -6.70E-05 | 5.70E-04 | 0.91    | 0.92 |
| rs2304206  | <i>SCAF1-IRF3-BCL2L12</i>                                                       | 2.70E-02 | 2.66E-02 | -3.80E-04 | 5.50E-04 | 0.49    | 0.78 |
| rs6059655  | <i>RALY-EIF252-ASIP-<br/>AHCY-ITCH</i>                                          | 7.76E-02 | 7.51E-02 | -2.50E-03 | 7.40E-04 | 8.2E-04 | 0.02 |
| rs6012953  | <i>PTPN1</i>                                                                    | 1.32E-02 | 1.18E-02 | -1.40E-03 | 4.90E-04 | 4.2E-03 | 0.07 |
| rs12482904 | <i>UBASH3A</i>                                                                  | 1.67E-02 | 1.77E-02 | 9.50E-04  | 1.00E-03 | 0.36    | 0.75 |
| rs229527   | <i>C1QTNF6</i>                                                                  | 2.51E-02 | 2.44E-02 | -6.30E-04 | 9.60E-04 | 0.51    | 0.78 |
| rs9611565  | <i>ZC3H7B-TEF</i>                                                               | 3.47E-02 | 3.33E-02 | -1.40E-03 | 6.80E-04 | 0.04    | 0.24 |

SE, Standard Error

## SUPPLEMENTAL REFERENCES

1. Jin, Y., Andersen, G., Yorgov, D., Ferrara, T.M., Ben, S., Brownson, K.M., Holland, P.J., Birlea, S.A., Siebert, J., Hartmann, A., et al. (2016). Genome-wide association studies of autoimmune vitiligo identify 23 new risk loci and highlight key pathways and regulatory variants. *Nat. Genet.* *48*, 1418-1424.
2. Jin, Y., Roberts, G.H.L., Ferrara, T.M., Ben, S., van Geel, N., Wolkerstorfer, A., Ezzedine, K., Siebert, J., Neff, C.P., Palmer, B.E., et al. (2019). Early-onset autoimmune vitiligo associated with an enhancer variant haplotype that upregulates class II HLA expression. *Nat. Commun.* *10*, 391.
3. Ben, S., Jin, Y., Santorico, S.A., and Spritz, R.A. (2018). Genome-Wide Association of *PVT1* with Vitiligo. *J. Invest. Dermatol.* *138*, 1884-1886.
